# Supplementary material for: Experimental induction of resins as a tool to understand variability in ambers
Source: Copernicus journal article supplement (doi:10.5194/fr-24-321-2021), 2021-10-11
Supplement: Supplementary file 1 [file fr-24-321-2021-supplement.zip]

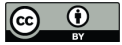

*Supplement of*

**Experimental induction of resins as a tool to understand variability in ambers**

**Leyla J. Seyfullah et al.**

*Correspondence to:* Leyla J. Seyfullah ([leyla.seyfullah@univie.ac.at](mailto:leyla.seyfullah@univie.ac.at))

- fr-24-321-2021-supplement-title-page.pdf
- Agathis experiment1 meta.txt
- Agathis experiment1.txt
- Resins.R
- Wollemia expt meta.txt
- Wollemia expt.txt

The copyright of individual parts of the supplement might differ from the article licence.
